# Supplementary material for: In situ construction of FeNi2Se4-FeNi LDH heterointerfaces with electron redistribution for enhanced overall water splitting
Source: Royal Society of Chemistry journal article supplement (doi:10.1039/d1qi01185e), 2021-11-09
Supplement: d1qi01185e1.pdf [file d1qi01185e1.pdf]

## Supporting Information

### **In-situ construction of FeNi<sub>2</sub>Se<sub>4</sub>-FeNi LDH heterointerfaces with electron redistribution for enhanced overall water splitting**

Hanzhi Yu, Yaoyi Xie, Liming Deng, Hongjiao Huang, Junnan Song, Deshuang Yu, Linlin Li\* and Shengjie Peng\*

Jiangsu Key Laboratory of Electrochemical Energy Storage Technologies, College of Materials Science and Technology, Nanjing University of Aeronautics and Astronautics,

Nanjing 210016, China

E-mail: lilinlin@nuaa.edu.cn, pengshengjie@nuaa.edu.cn

## Supplementary Figures and Tables

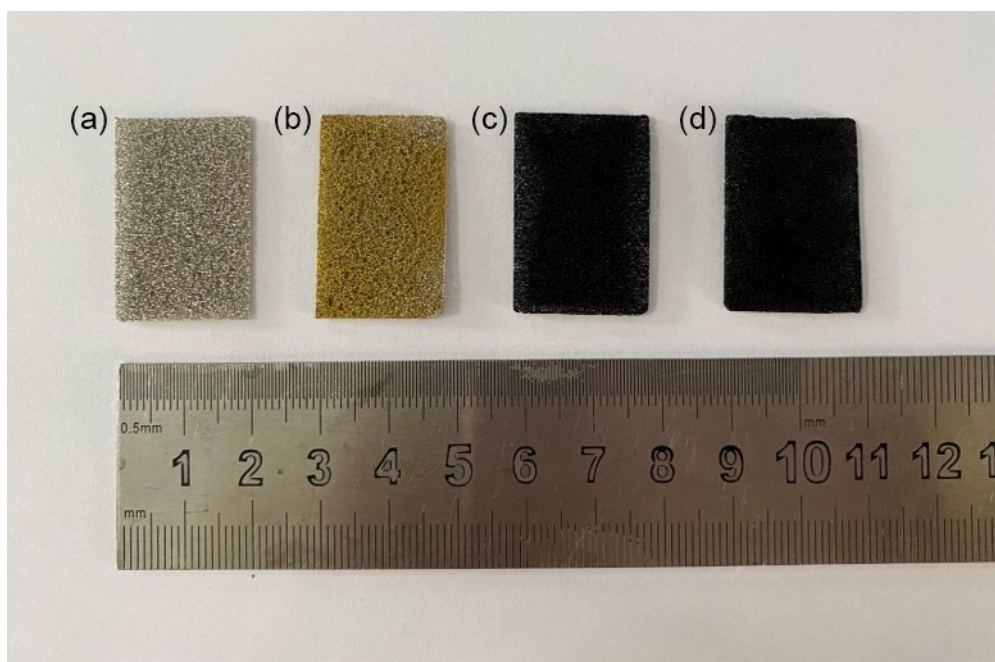

**Fig. S1.** Optical photograph of (a) bare nickel foam, (b) FeNi LDH/NF, (c) FeNi<sub>2</sub>Se<sub>4</sub>-FeNi LDH/NF and (d) FeNi<sub>2</sub>Se<sub>4</sub>/NF.

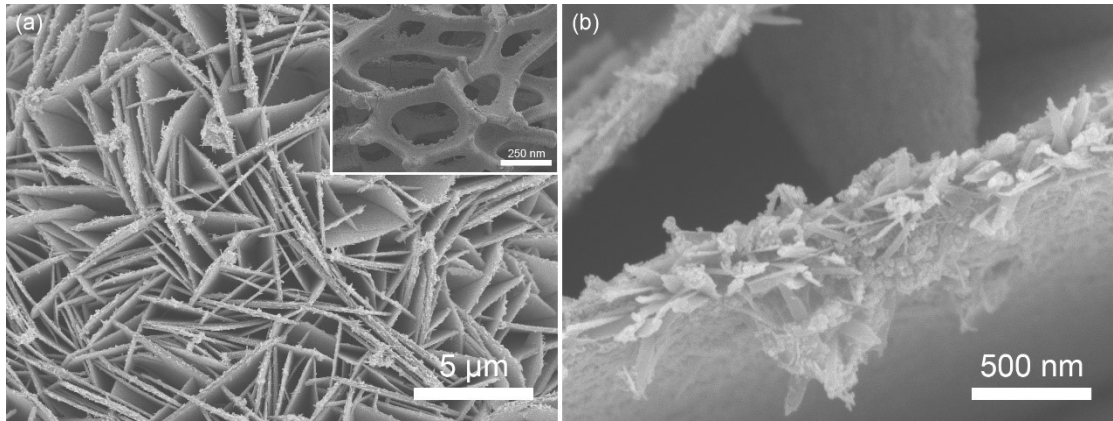

**Fig. S2.** SEM images of (a, b)  $\text{FeNi}_2\text{Se}_4\text{-FeNi LDH/NF-90}$ .

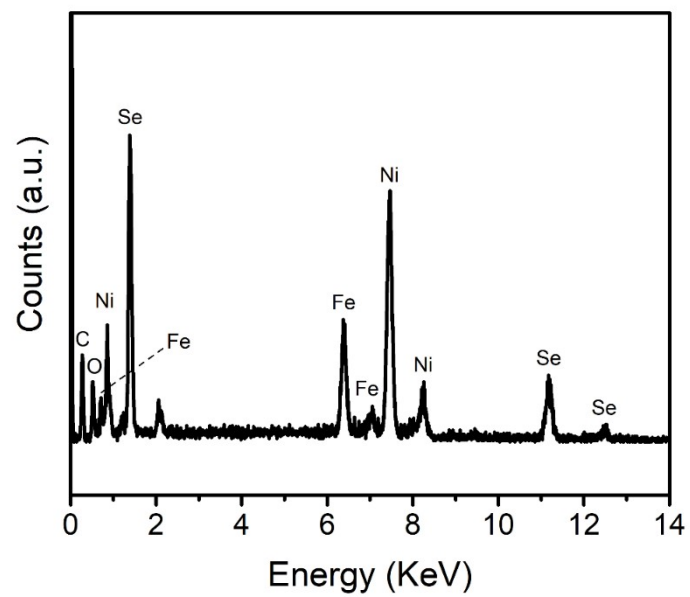

**Fig. S3.** EDX pattern of  $\text{FeNi}_2\text{Se}_4\text{-FeNi}$  LDH/NF.

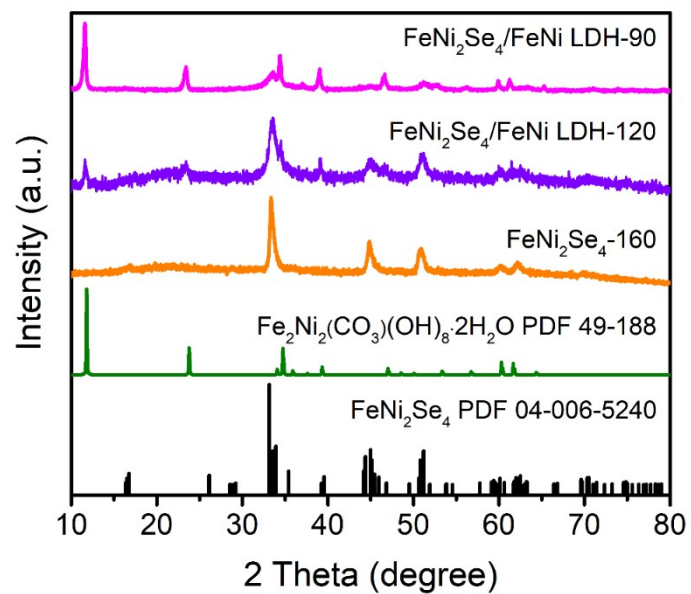

**Fig. S4.** XRD spectrum of FeNi LDH via different selenization temperatures.

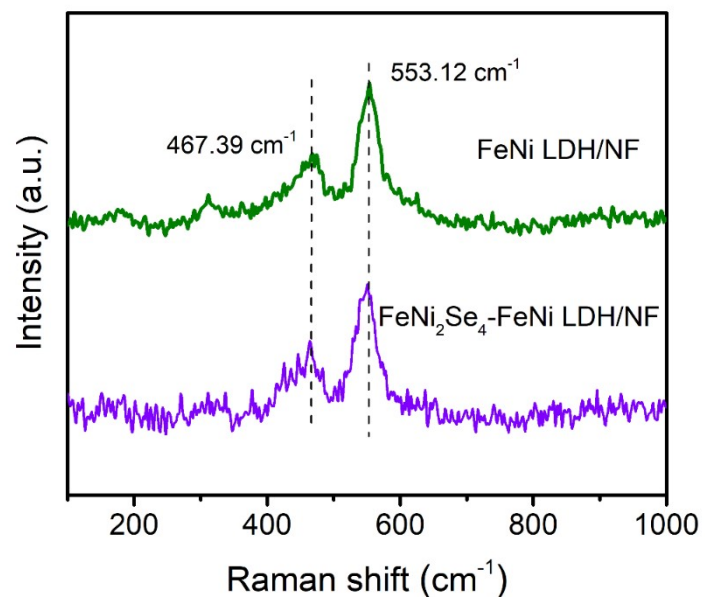

**Fig. S5.** Raman spectra of FeNi LDH and FeNi<sub>2</sub>Se<sub>4</sub>-FeNi LDH.

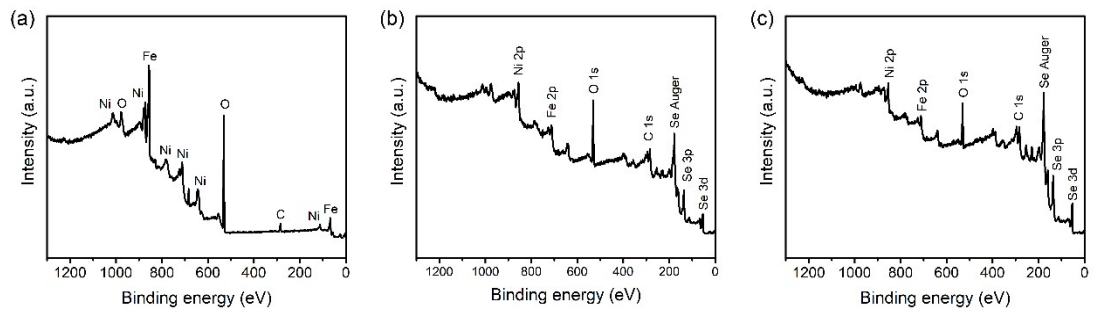

**Fig. S6.** XPS full spectra of (a) FeNi LDH, (b) FeNi<sub>2</sub>Se<sub>4</sub>-FeNi LDH and (c) FeNi<sub>2</sub>Se<sub>4</sub>.

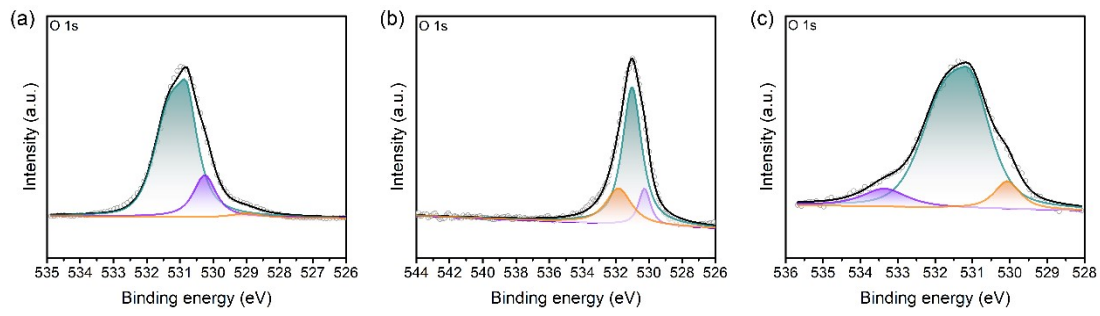

**Fig. S7.** O 1s of (a) FeNi LDH, (b) FeNi<sub>2</sub>Se<sub>4</sub>-FeNi LDH and (c) FeNi<sub>2</sub>Se<sub>4</sub>.



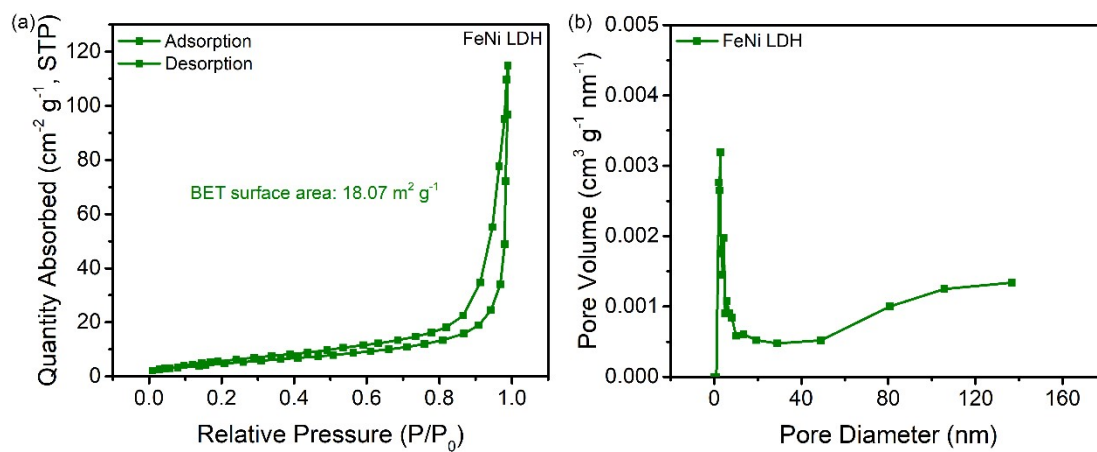

**Fig. S8.** (a) N<sub>2</sub> adsorption/desorption isotherm and (b) the corresponding pore size distribution of FeNi LDH.

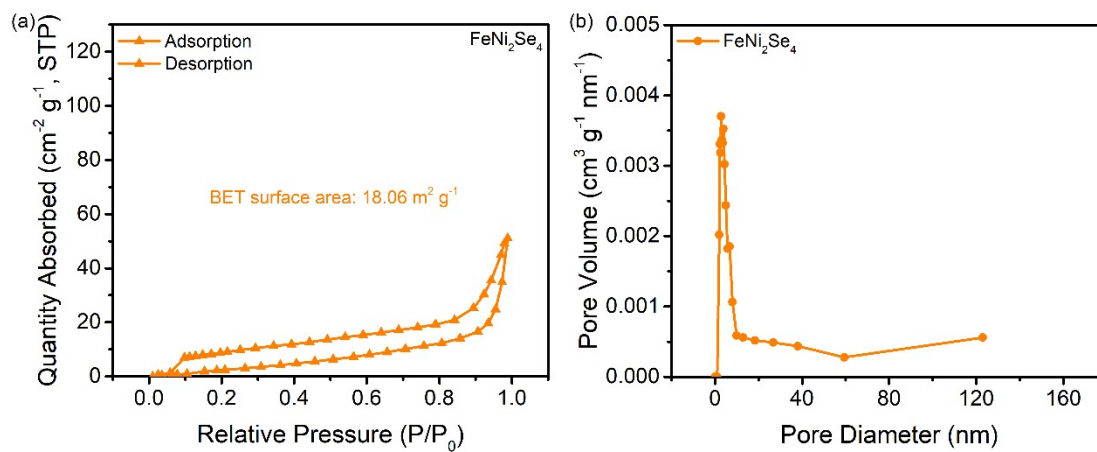

**Fig. S9.** (a) N<sub>2</sub> adsorption/desorption isotherm and (b) the corresponding pore size distribution of FeNi<sub>2</sub>Se<sub>4</sub>.

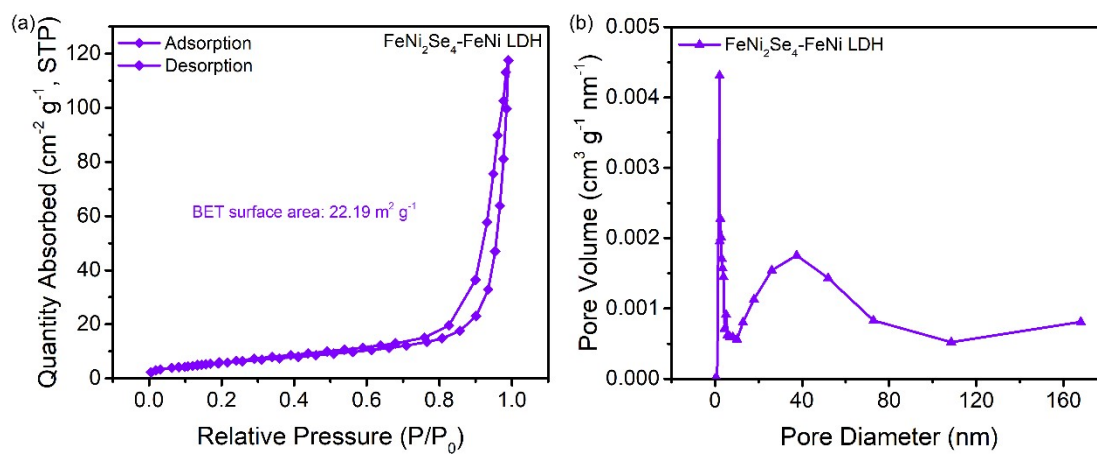

**Fig. S10.** (a) N<sub>2</sub> adsorption/desorption isotherm and (b) the corresponding pore size distribution of FeNi<sub>2</sub>Se<sub>4</sub>-FeNi LDH.

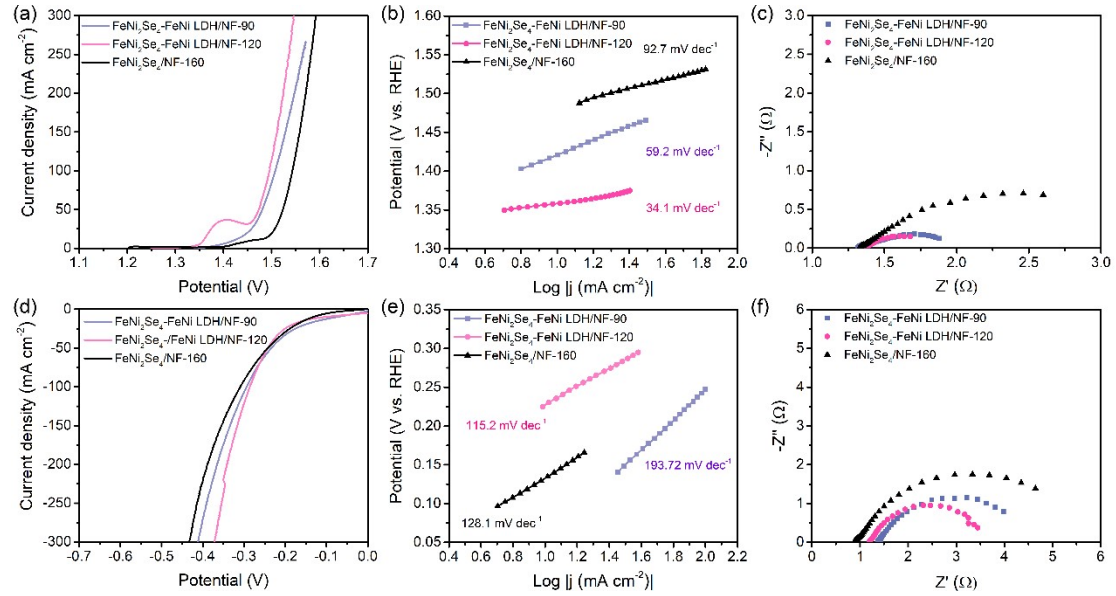

**Fig. S11.** (a) OER and (d) HER LSV curves of FeNi<sub>2</sub>Se<sub>4</sub>-FeNi LDH/NF-90, FeNi<sub>2</sub>Se<sub>4</sub>-FeNi LDH/NF-120 and FeNi<sub>2</sub>Se<sub>4</sub>/NF-160. (b, e) Tafel plots. (c, f) Nyquist plots.

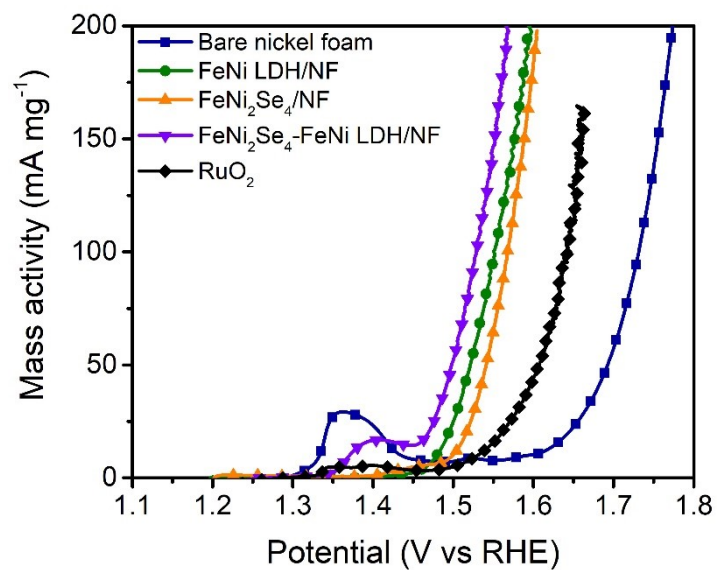

**Fig. S12.** OER LSV polarization curves normalized to catalyst loading of FeNi LDH, FeNi<sub>2</sub>Se<sub>4</sub> and FeNi<sub>2</sub>Se<sub>4</sub>-FeNi LDH.

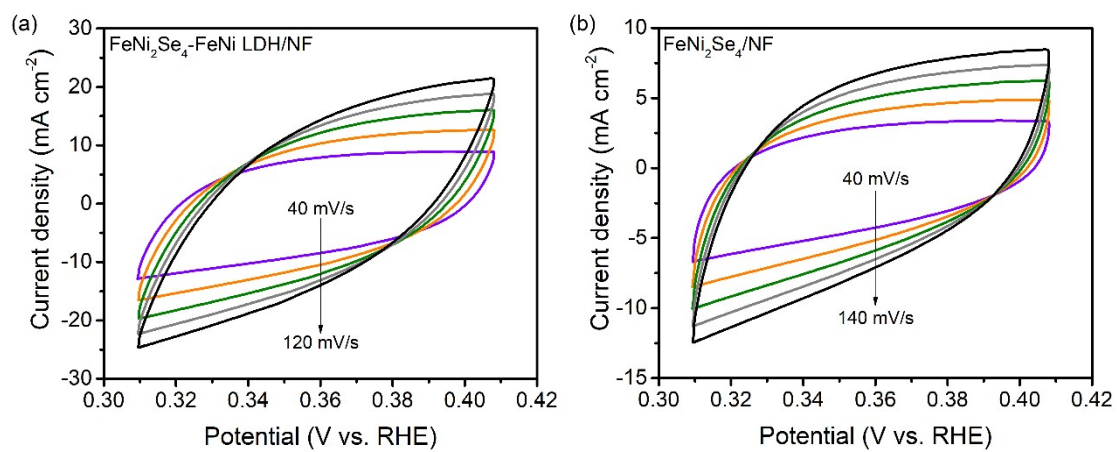

**Fig. S13.** Cyclic voltammograms of different samples from 20 mV s<sup>-1</sup> to 140 mV s<sup>-1</sup> between 0.31 V and 0.41 V.

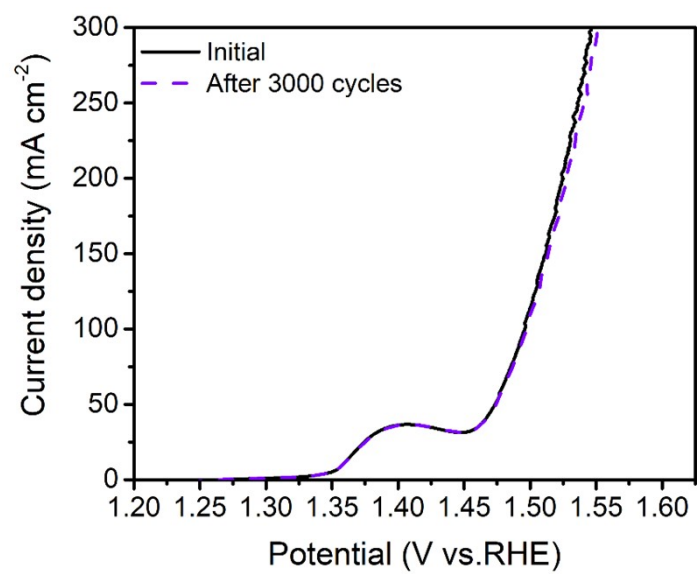

**Fig. S14.** OER LSV curves of FeNi<sub>2</sub>Se<sub>4</sub>-FeNi LDH/NF before and after 3000 CV scans.

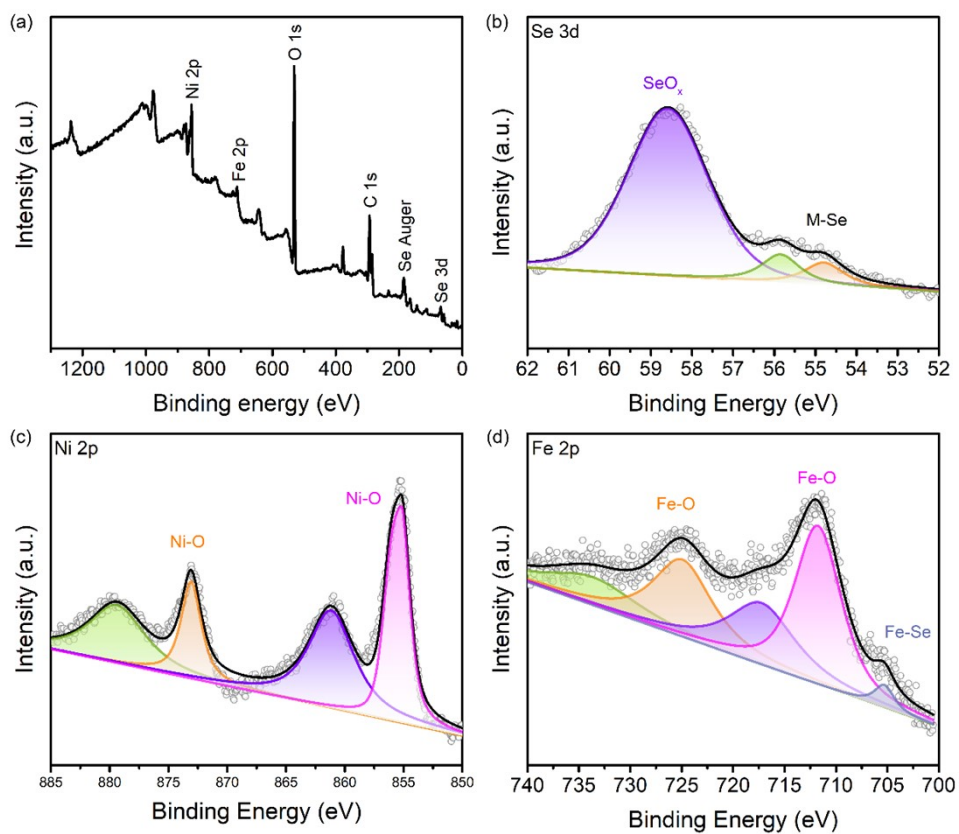

**Fig. S15.** (a) XPS full spectra of FeNi<sub>2</sub>Se<sub>4</sub>-FeNi LDH/NF after OER test, (b) Se 3d spectra, (c) Ni 2p spectra and (d) Fe 2P spectra after OER test.



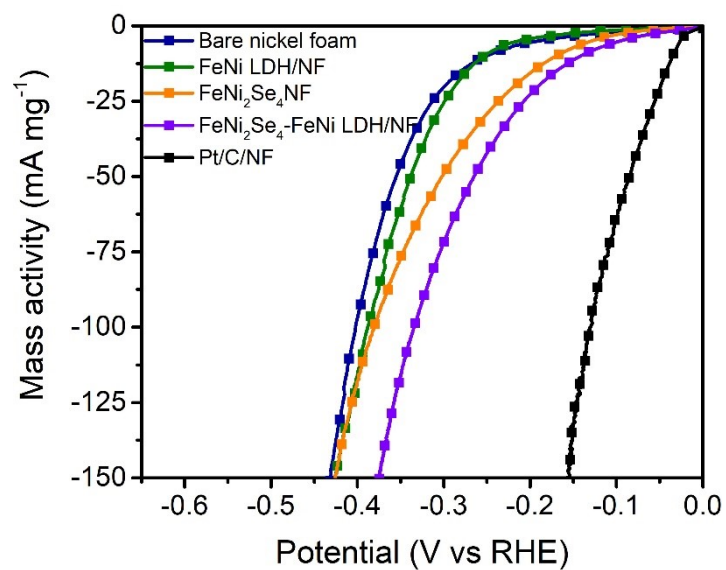

**Fig. S16.** HER LSV polarization curves normalized to catalyst loading of FeNi LDH, FeNi<sub>2</sub>Se<sub>4</sub> and FeNi<sub>2</sub>Se<sub>4</sub>-FeNi LDH.

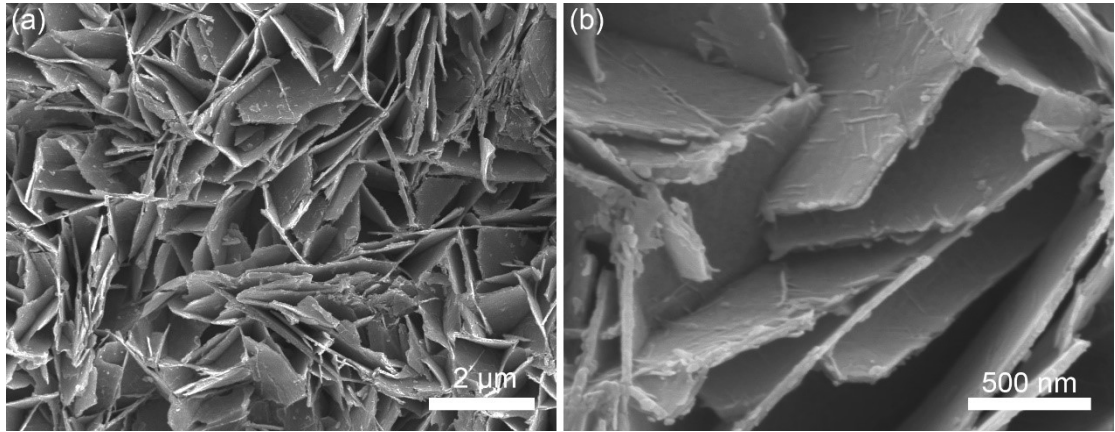

**Fig. S17.** SEM images of (a, b) FeNi<sub>2</sub>Se<sub>4</sub>-FeNi LDH/NF after the HER test.

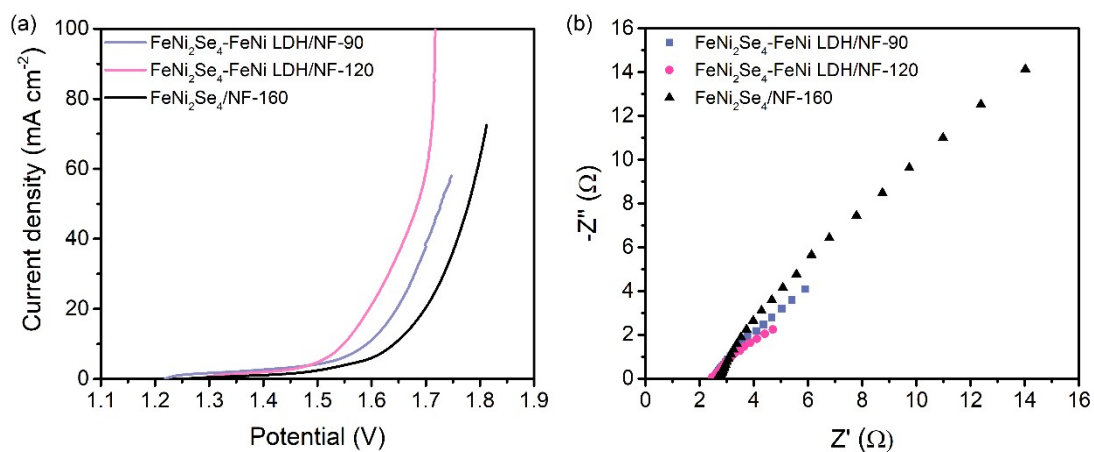

**Fig. S18.** Overall water splitting performance in 1.0 M KOH. (a) Polarization curves of FeNi<sub>2</sub>Se<sub>4</sub>-FeNi LDH/NF-90, FeNi<sub>2</sub>Se<sub>4</sub>-FeNi LDH/NF-120 and FeNi<sub>2</sub>Se<sub>4</sub>/NF-160 with iR correction. (b) Nyquist plots.

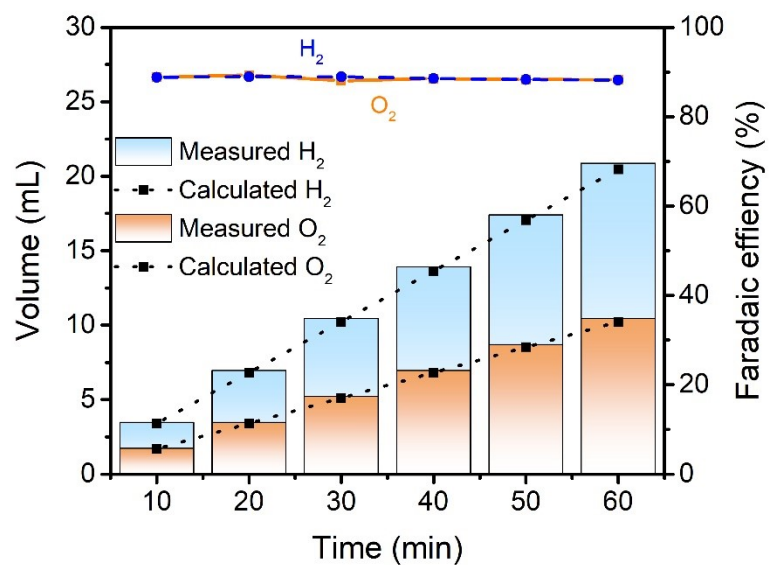

**Fig. S19.** Amount of hydrogen theoretically calculated and experimentally measured and the Faradaic efficiency.

**Table S1.** Comparison of  $\eta_{10}$  and Tafel slopes for OER between FeNi<sub>2</sub>Se<sub>4</sub>-FeNi LDH/NF and various reported catalysts.

| Catalysts                                                                   | Tafel slope (mV dec <sup>-1</sup> ) | Overpotential (mV) | Reference                                            |
|-----------------------------------------------------------------------------|-------------------------------------|--------------------|------------------------------------------------------|
| FeNi <sub>2</sub> Se <sub>4</sub> -FeNi LDH/NF                              | 30.14                               | 205 @10            | This work                                            |
| MoS <sub>2</sub> /Fe <sub>5</sub> Ni <sub>4</sub> S <sub>8</sub> /FeNi foam | 28.1                                | 204 @10            | Adv. Mater. 2018, 30, 1803151                        |
| CoV-Fe <sub>0.28</sub>                                                      | 39.1                                | 215 @10            | Adv. Energy Mater. 2020, 10, 2002215                 |
| FeNi LDH/CoP/CC                                                             | 33.5                                | 225 @10            | Angew. Chem. Int. Ed. 2019, 58,11903-11909           |
| (Ni <sub>0.77</sub> Fe <sub>0.23</sub> )Se <sub>2</sub>                     | 69                                  | 228 @10            | J. Mater. Chem. A 2019, 7, 2831-2837                 |
| H <sub>2</sub> PO <sub>2</sub> <sup>-</sup> /FeNi-LDH-V <sub>2</sub> C      | 46                                  | 250 @10            | Applied Catalysis B: Environmental 2021, 297, 120474 |
| CoO-CoSe <sub>2</sub> @N-CNTs/rGO                                           | 68                                  | 250 @10            | Chemical Engineering Journal 2021, 422, 129982       |
| Fe <sub>0.09</sub> Co <sub>0.13</sub> -NiSe <sub>2</sub>                    | 63                                  | 251 @10            | Adv. Mater. 2018, 30, 1802121                        |
| Ni-Fe-S <sub>3.1</sub> -160                                                 | 40                                  | 245 @20            | J. Mater. Chem. A 2019, 7, 12350-12357               |
| Fe <sub>7.4%</sub> -NiSe                                                    | 43                                  | 231 @50            | J. Mater. Chem. A 2019, 7, 2233-2241                 |
| NiSe-Ni <sub>0.85</sub> Se/CP                                               | 98                                  | 300 @10            | Small 2018, 14, 1800763                              |
| FeOOH(Se)                                                                   | 54                                  | 287 @10            | J. Am. Chem. Soc. 2019, 141, 7005-7013               |
| NiFe(OH) <sub>x</sub> /FeS                                                  |                                     | 245 @50            | Adv. Funct. Mater. 2019, 29, 1902180                 |
| MIL-59(FeNi)/Co NSs                                                         | 38.46                               | 216 @20            | Chemical Engineering Journal 2020, 400, 125884       |

|                                               |      |         |                                                      |
|-----------------------------------------------|------|---------|------------------------------------------------------|
| NF/NiSe@Fe <sub>2</sub> O <sub>3</sub>        | 36.9 | 220 @10 | Science Bulletin 2021, 66, 52-61                     |
| M-CoO/CoFe LDHs                               | 34   | 254 @10 | Small 2018, 14, 1800195                              |
| CoFeV LDH/NF                                  | 57   | 242 @10 | ACS Sustainable Chem. Eng. 2019, 7, 16828-16834      |
| Ni <sub>3</sub> Se <sub>4</sub> @NiFe LDH/CFC | 55.5 | 223 @10 | Nanoscale Horiz. 2019, 4, 1132-1138                  |
| Fe-CoF <sub>2</sub> -300                      | 41.9 | 230 @10 | Chemical Engineering Journal 2021, 425, 130686       |
| Co <sub>9</sub> S <sub>8</sub> @NiFe LDH      | 52   | 220 @10 | J. Mater. Chem. A 2021, 9, 12244-12254               |
| NiCo <sub>2</sub> S <sub>4</sub> @NiFe LDH    | 86.4 | 287 @10 | Applied Catalysis B: Environmental 2021, 286, 119869 |

**Table S2.** The comparison of water splitting performances of FeNi<sub>2</sub>Se<sub>4</sub>-FeNi LDH/NF and other catalysts in the literature.

| Catalysts                                            | Substrate | Voltage (V) | Reference                                            |
|------------------------------------------------------|-----------|-------------|------------------------------------------------------|
| FeNi <sub>2</sub> Se <sub>4</sub> -FeNi LDH/NF       | NF        | 1.56        | This work                                            |
| FeNi LDH/CoP/CC                                      | CC        | 1.617       | Angew. Chem. Int. Ed. 2019, 58,11903-11909           |
| NiSe-Ni <sub>0.85</sub> Se/CP                        | CP        | 1.62        | Small 2018, 14, 1800763                              |
| NiCo <sub>2</sub> S <sub>4</sub> @NiFe LDH           | NF        | 1.6         | Applied Catalysis B: Environmental 2021, 286, 119869 |
| hetero-Ni <sub>3</sub> Se <sub>4</sub> @NiFe LDH/CFC | CFC       | 1.54        | Nanoscale Horiz. 2019, 4, 1132-1138                  |
| Co <sub>9</sub> S <sub>8</sub> @NiFe LDH             | NF        | 1.63        | J. Mater. Chem. A 2021, 9, 12244-12254               |
| CCF LDH-60                                           | Cu foam   | 1.681       | Nano Energy 2017, 41 327-336                         |
| FeNi@FeNiB-700                                       | FeNi foam | 1.65        | J. Mater. Chem. A 2019, 7, 19554-19564               |
| Fe <sub>7.4%</sub> -NiSe                             | NF        | 1.585       | J. Mater. Chem. A 2019, 7, 2233-2241                 |
| NiFe LDH@NiCoP                                       | NF        | 1.57        | Adv. Funct. Mater. 2018, 1706847                     |

**Table S3.** OER Fitting results of EIS for FeNi LDH, FeNi<sub>2</sub>Se<sub>4</sub> and FeNi<sub>2</sub>Se<sub>4</sub>-FeNi LDH.

| Catalysts                                   | Rs (ohm) | Rct (ohm) | Error (%) |
|---------------------------------------------|----------|-----------|-----------|
| FeNi LDH                                    | 1.275    | 11.3      | 0.807     |
| FeNi <sub>2</sub> Se <sub>4</sub>           | 0.897    | 5.288     | 2.586     |
| FeNi <sub>2</sub> Se <sub>4</sub> -FeNi LDH | 1.209    | 2.445     | 0.816     |



**Table S4.** HER Fitting results of EIS for FeNi LDH, FeNi<sub>2</sub>Se<sub>4</sub> and FeNi<sub>2</sub>Se<sub>4</sub>-FeNi LDH.

| Catalysts                                   | Rs (ohm) | Rct (ohm) | Error (%) |
|---------------------------------------------|----------|-----------|-----------|
| FeNi LDH                                    | 1.419    | 7.660     | 1.113     |
| FeNi <sub>2</sub> Se <sub>4</sub>           | 1.390    | 1.818     | 0.204     |
| FeNi <sub>2</sub> Se <sub>4</sub> -FeNi LDH | 1.249    | 5.668     | 0.390     |
